# Supplementary material for: AI-Driven Bone and Marrow Segmentation on FLT-PET/CT: Technical Multi-organ Validation in AML and HCT
Source: Research Square preprint supplement (doi:10.21203/rs.3.rs-9077609/v1), 2026-04-19
Supplement: Supplementary file 1 [file ccc8c0002e93324dab36e3ec.pdf]

# AI-Driven Bone and Marrow Segmentation on FLT-PET/CT: Technical Multi-organ Validation in AML and HCT

Malakeh Malekzadeh<sup>1,2</sup>, Hemendra Ghimire<sup>1,2</sup>, Karteek Popuri<sup>4</sup>, Kazuki Fujita<sup>1,2,3</sup>, Amandeep Salhotra<sup>5</sup>, Dave Yamauchi<sup>6</sup>, Bihong Chen<sup>6</sup>, Jerry Froelich<sup>7</sup>, Guy Storme<sup>8</sup>, Anthony Stein<sup>5</sup>, Mirza Faisal Beg<sup>9</sup>, Jeffrey Wong<sup>1</sup>, Monzr MAI Malki<sup>5§</sup> and Susanta K. Hui<sup>1,2\*§</sup>

<sup>1</sup> Department of Radiation Oncology, City of Hope National Medical Center, Duarte, USA

<sup>2</sup> Beckman Research Institute, City of Hope National Medical Center, Duarte, USA

<sup>3</sup> Department of Medical Physics and Engineering, Osaka University Graduate School of Medicine, Suita, Japan

<sup>4</sup> Department of Computer Science, Memorial University of Newfoundland, Labrador, Canada

<sup>5</sup> Department of Hematology, City of Hope National Medical Center, Duarte, USA

<sup>6</sup> Department of Diagnostic Radiology, City of Hope National Medical Center, Duarte, USA

<sup>7</sup> Department of Radiology, University of Minnesota, Minneapolis, USA

<sup>8</sup> Department of Radiotherapy, Universitair Ziekenhuis (UZ) Brussels, Brussels, Belgium

<sup>9</sup> School of Engineering Science, Simon Fraser University, Burnaby, Canada

§These authors have contributed equally to this work

**Corresponding Author:** Susanta K. Hui, PhD

Department of Radiation Oncology, City of Hope National Medical Center, Duarte, USA

Address: 1500 E Duarte Road, Duarte, CA 91010, USA

Email: shui@coh.org

**Supplementary:**

**Table S1. Mean  $\pm$  SD SUV values of bone ROIs across 20 patients (12 whole-body scans and 10 additional upper-body scans).**

| <b>Bone</b>             |                  |                                 |                     |                      |                                 |
|-------------------------|------------------|---------------------------------|---------------------|----------------------|---------------------------------|
| <b>ROI</b>              |                  | <b>Mean <math>\pm</math> SD</b> | <b>ROI</b>          |                      | <b>Mean <math>\pm</math> SD</b> |
| <b>Sacrum</b>           |                  | 3.396 $\pm$ 2.08                | <b>Trabecular</b>   | <b>T1</b>            | 7.084 $\pm$ 3.6                 |
| <b>All_Bone</b>         |                  | 2.278 $\pm$ 1.13                |                     | <b>T2</b>            | 7.555 $\pm$ 3.9                 |
| <b>All_Bone_No Arms</b> |                  | 2.465 $\pm$ 1.2                 |                     | <b>T3</b>            | 8.135 $\pm$ 3.77                |
| <b>L_Arm_Bone</b>       |                  | 0.5461 $\pm$ 0.34               |                     | <b>T4</b>            | 8.421 $\pm$ 4.51                |
| <b>R_Arm_Bone</b>       |                  | 0.547 $\pm$ 0.25                |                     | <b>T5</b>            | 8.208 $\pm$ 4.06                |
| <b>Cortical</b>         | <b>T1</b>        | 4.17 $\pm$ 2.12                 |                     | <b>T6</b>            | 8.098 $\pm$ 4.47                |
|                         | <b>T2</b>        | 4.803 $\pm$ 2.37                |                     | <b>T7</b>            | 8.466 $\pm$ 4.34                |
|                         | <b>T3</b>        | 4.933 $\pm$ 2.39                |                     | <b>T8</b>            | 8.622 $\pm$ 4.52                |
|                         | <b>T4</b>        | 5.122 $\pm$ 2.54                |                     | <b>T9</b>            | 8.321 $\pm$ 4.39                |
|                         | <b>T5</b>        | 5.17 $\pm$ 2.48                 |                     | <b>T10</b>           | 8.563 $\pm$ 4.54                |
|                         | <b>T6</b>        | 5.162 $\pm$ 2.62                |                     | <b>T11</b>           | 8.403 $\pm$ 4.58                |
|                         | <b>T7</b>        | 5.425 $\pm$ 2.68                |                     | <b>T12</b>           | 7.925 $\pm$ 4.43                |
|                         | <b>T8</b>        | 5.339 $\pm$ 2.67                |                     | <b>L1</b>            | 7.701 $\pm$ 4.69                |
|                         | <b>T9</b>        | 5.157 $\pm$ 2.58                |                     | <b>L2</b>            | 7.335 $\pm$ 4.26                |
|                         | <b>T10</b>       | 5.140 $\pm$ 2.57                |                     | <b>L3</b>            | 7.236 $\pm$ 4.17                |
|                         | <b>T11</b>       | 5.066 $\pm$ 2.55                |                     | <b>L4</b>            | 6.91 $\pm$ 4.17                 |
|                         | <b>T12</b>       | 4.726 $\pm$ 2.56                |                     | <b>L5</b>            | 5.991 $\pm$ 4.06                |
|                         | <b>L1</b>        | 4.365 $\pm$ 2.61                |                     | <b>Sacrum</b>        | 5.304 $\pm$ 3.47                |
|                         | <b>L2</b>        | 4.244 $\pm$ 2.45                |                     | <b>L_Femur_Shaft</b> | 1.036 $\pm$ 0.44                |
|                         | <b>L3</b>        | 4.292 $\pm$ 2.39                |                     | <b>R_Femur_Shaft</b> | 1.062 $\pm$ 0.44                |
|                         | <b>L4</b>        | 4.001 $\pm$ 2.28                | <b>L_Femur_Head</b> | 1.783 $\pm$ 1.59     |                                 |
| <b>L5</b>               | 4.043 $\pm$ 2.53 | <b>R_Femur_Head</b>             | 1.817 $\pm$ 1.59    |                      |                                 |
| <b>Sacrum</b>           | 3.082 $\pm$ 1.82 | <b>L_Femur_Neck</b>             | 2.266 $\pm$ 1.68    |                      |                                 |
| <b>L_Hip_Bone</b>       | 3.16 $\pm$ 1.81  | <b>R_Femur_Neck</b>             | 2.365 $\pm$ 1.78    |                      |                                 |
| <b>R_Hip_Bone</b>       | 3.097 $\pm$ 1.74 | <b>All_Bone</b>                 | 1.378 $\pm$ 0.73    |                      |                                 |

**Table S2. Mean  $\pm$  SD SUV values of muscle, bone and adipose ROIs across 20 patients (12 whole-body scans and 10 additional upper-body scans).**

| <b>Muscle</b>  |  |                                 |                |  |                                 |
|----------------|--|---------------------------------|----------------|--|---------------------------------|
| <b>ROI</b>     |  | <b>Mean <math>\pm</math> SD</b> | <b>ROI</b>     |  | <b>Mean <math>\pm</math> SD</b> |
| <b>All_Fat</b> |  | 0.485 $\pm$ 0.23                | <b>RPECMNR</b> |  | 0.776 $\pm$ 0.28                |

|                                   |              |                             |              |
|-----------------------------------|--------------|-----------------------------|--------------|
| All_Fat_No Arms                   | 0.494 ± 0.24 | <b>LTEMPORALIS</b>          | 0.717 ± 0.28 |
| LLWLGIMAT                         | 0.377 ± 0.1  | <b>RTEMPORALIS</b>          | 0.673 ± 0.24 |
| RLWLGIMAT                         | 0.382 ± 0.09 | <b>LMASSETER</b>            | 0.664 ± 0.25 |
| All Fat                           | 0.378 ± 0.14 | <b>RMASSETER</b>            | 0.638 ± 0.24 |
| VAT                               | 4.134 ± 1.97 | <b>LSCM</b>                 | 0.631 ± 0.25 |
| All_SKM [-29,150] LB              | 0.511 ± 0.07 | <b>RSCM</b>                 | 0.655 ± 0.27 |
| All_SKM [-150, -50] LB            | 3.874 ± 1.88 | <b>LASKM</b>                | 0.455 ± 0.19 |
| VAT [-150, -50]                   | 0.297 ± 0.07 | <b>RASKM</b>                | 0.465 ± 0.17 |
| VAT                               | 0.919 ± 0.45 | <b>PaAT</b>                 | 0.937 ± 0.36 |
| EpAT                              | 0.783 ± 0.31 | <b>ThAT</b>                 | 0.773 ± 0.26 |
| SAT [-190, -30]                   | 0.449 ± 0.07 | <b>SAT</b>                  | 0.345 ± 0.15 |
| All_IMAT [-190, -30] _No Arms     | 1.076 ± 0.48 | <b>LASAT</b>                | 0.299 ± 0.12 |
| LLWLGSKM                          | 0.458 ± 0.09 | <b>RASAT</b>                | 0.299 ± 0.11 |
| RLWLGSKM                          | 0.461 ± 0.08 | <b>All_IMAT_No Arms</b>     | 0.707 ± 0.25 |
| LUPLGIMAT                         | 0.594 ± 0.23 | <b>All_IMAT [-190, -30]</b> | 0.672 ± 0.24 |
| RUPLGIMAT                         | 0.605 ± 0.23 | <b>L_Arm_IMAT</b>           | 0.414 ± 0.19 |
| LUPLGSKM                          | 0.615 ± 0.24 | <b>R_Arm_IMAT</b>           | 0.412±0.18   |
| RUPLGSKM                          | 0.623 ± 0.25 | <b>VAT [-150, -50]</b>      | 0.914 ± 0.45 |
| LILIOPSOAS                        | 0.774 ± 0.38 | <b>SAT [-190, -30]</b>      | 0.344 ± 0.15 |
| RILIOPSOAS                        | 0.765 ± 0.39 | <b>All_SKM [-29,150] UB</b> | 0.66 ± 0.24  |
| All_SKM_UB_No Arms                | 0.687 ± 0.26 | <b>All_SKM_UB</b>           | 0.666 ± 0.24 |
| All_SKM [-29, 150] UB_No Arms     | 0.683 ± 0.26 | <b>LPECMJR</b>              | 0.556 ± 0.21 |
| All_IMAT [-190, -30] _No Arms     | 0.699 ± 0.25 | <b>RPECMJR</b>              | 0.597 ± 0.22 |
| VAT [-150, -50]-U-SAT [-190, -30] | 0.462 ± 0.24 | <b>LPECMNR</b>              | 0.692 ± 0.27 |
| All_IMAT                          | 0.678 ± 0.24 | ---                         | -----        |

All SKM = all skeletal muscles; All SKM[-29,150] = all skeletal muscles within HU -29 to 150; No Arms = excluding upper limbs; UB=Upper body; LW=Lower Body; LPECMJR/RPECMJR = left/right pectoralis major; LPECMNR/RPECMNR = left/right pectoralis minor; LTEMPORALIS/RTEMPORALIS = left/right temporalis; LMASSETER/RMASSETER = left/right masseter; LSCM/RSCM = left/right sternocleidomastoid; LILIOPSOAS/RILIOPSOAS = left/right iliopsoas; LUPLGSKM/RUPLGSKM = left/right upper limb muscles;

LLWLGSKM/RLWLGSKM = left/right lower limb muscles; LASKM/RASKM = left/right abdominal muscles; VAT = visceral adipose tissue; VAT[-150,-50] = visceral fat within HU -150 to -50; EPAT = epicardial/pericardial fat; PAAT = periaortic fat; THAT = thoracic fat; SAT = subcutaneous fat; SAT[-190,-30] = subcutaneous fat within HU -190 to -30; LASAT/RASAT = left/right abdominal subcutaneous fat. IMAT = intramuscular adipose tissue; All\_IMAT [-190, -30] = IMAT within HU -190 to -30; LUPLGIMAT/RUPLGIMAT = left/right upper limb IMAT; LLWLGIMAT/RLWLGIMAT = left/right lower limb IMAT; LAIMAT/RAIMAT = left/right abdominal IMAT.

**Table S3. Mean ± SD SUV values of organ ROIs across 20 patients (12 whole-body scans and 10 additional upper-body scans).**

| Organ                |               |                              |                        |              |
|----------------------|---------------|------------------------------|------------------------|--------------|
| ROI                  | Mean ± SD     | ROI                          | Mean ± SD              |              |
| AOC-U-CAAC           | 0.923 ± 0.4   | <b>Lung</b>                  | <b>R_Superior Lobe</b> | 0.531 ± 0.17 |
| Aortic calcification | 0.852 ± 0.41  |                              | <b>R_Middle Lobe</b>   | 0.627 ± 0.2  |
| CAAC                 | 1.041 ± 0.35  |                              | <b>R_Inferior Lobe</b> | 0.964 ± 0.33 |
| Spleen               | 2.643 ± 1.34  |                              | <b>L_Superior Lobe</b> | 0.529 ± 0.18 |
| L_Kidney             | 2.432 ± 1.11  |                              | <b>L_Inferior Lobe</b> | 0.744 ± 0.24 |
| R_Kidney             | 2.772 ± 1.42  | <b>Esophagus</b>             |                        | 1.365 ± 0.48 |
| Gall Blader          | 1.712 ± 1.12  | <b>Stomach</b>               |                        | 1.057 ± 0.56 |
| Pancreas             | 0.949 ± 0.53  | <b>Liver</b>                 |                        | 3.94 ± 1.66  |
| Brain                | 0.31 ± 0.12   | <b>Bowel</b>                 |                        | 1.079 ± 0.62 |
| Heart                | 0.959 ± 0.38  | <b>Skin</b>                  |                        | 0.299 ± 0.12 |
| Aorta                | 0.945 ± 0.39  | <b>L_Adrenal Gland</b>       |                        | 1.045 ± 0.59 |
| Inferior Vena Cava   | 1.422 ± 0.61  | <b>R_Adrenal Gland</b>       |                        | 1.641 ± 0.86 |
| Thyroid Gland        | 0.858 ± 0.35  | <b>L_Parotid Gland</b>       |                        | 0.832 ± 0.39 |
| All_L_Lung           | 0.619 ± 0.2   | <b>R_Parotid Gland</b>       |                        | 0.825 ± 0.37 |
| All_R_Lung           | 0.712 ± 0.22  | <b>L_Submandibular Gland</b> |                        | 1.149 ± 0.48 |
| Bladder              | 65.45 ± 43.39 | <b>R_Submandibular Gland</b> |                        | 1.157 ± 0.5  |
| Prostate             | 4.403 ± 4.21  | <b>pleural effusion</b>      |                        | <b>NA</b>    |
| Trachea              | 0.721 ± 0.26  | <b>ascites</b>               |                        | <b>NA</b>    |

AOC-U-CAAC= enables AOC-CAAC-based agatston score; CAAC= Cardiac aggregate calcium
